# Supplementary material for: Impact of High-Intensity Statin on Early Neurologic Deterioration in Patients with Single Small Subcortical Infarction
Source: MDPI journal article supplement (doi:10.3390/jcm12093260), 2023-05-03
Supplement: s1 [file s1]

## Supplemental Material

### Supplementary Methods

#### The definitions of END causes

Stroke recurrence was defined as neurological deterioration due to discrete new ischemic lesion in patients who were stable for  $\geq 24$  hours before occurrence of neurological deterioration. If this event was attributed to cerebral edema, mass effect, brain herniation syndrome or hemorrhagic transformation, it is not categorized into stroke recurrence. Stroke progression was defined as neurological deterioration due to progression of initial infarcted lesion (enlargement of initial infarcted lesion, perilesional edema), which was diagnosed on follow up imaging. Symptomatic hemorrhagic transformation was defined as neurological deterioration could be explained by visible hemorrhagic transformation on follow-up imaging. Other cause was defined as neurological deterioration due to probable medical conditions such as pneumonia, urinary tract infection or side effects of medication. Unknown cause was defined as neurological deterioration could not be explained by above END cause.

#### Supplementary Table S1. Summary of Statin drug and dose use within 72 hours of symptom onset

| High-intensity statin (n = 403) | Moderate-intensity statin (n=89) |
|---------------------------------|----------------------------------|
| Atorvastatin 80mg (n = 215)     | Atorvastatin 20mg (n = 38)       |
| Atorvastatin 40mg (n = 169)     | Atorvastatin 10mg (n = 9)        |
| Rosuvastatin 20mg (n = 19)      | Rosuvastatin 10mg (n = 42)       |

**Supplementary Table S2.** Baseline characteristics of Patients with or without Early Neurological Deterioration

|                                                      | Total (n=492)    | Moderate-intensity<br>statin (n=89) | High-intensity<br>statin (n=403) | P value |
|------------------------------------------------------|------------------|-------------------------------------|----------------------------------|---------|
| Age, y, mean $\pm$ SD                                | 67.2 $\pm$ 12.0  | 69.4 $\pm$ 10.8                     | 66.7 $\pm$ 12.2                  | 0.060   |
| Male, n (%)                                          | 297 (60.4%)      | 49 (55.1%)                          | 248 (61.5%)                      | 0.312   |
| Initial NIHSS score, median (IQR)                    | 3.0 [1.0;4.0]    | 3.0 [1.0; 4.0]                      | 3.0 [1.0; 4.0]                   | 0.977   |
| Onset to arrival time, h, median (IQR)               | 14.7 [5.0;28.5]  | 14.7 [3.7;27.2]                     | 14.6 [5.4;28.9]                  | 0.340   |
| <b>Vascular risk factors, n (%)</b>                  |                  |                                     |                                  |         |
| Hypertension                                         | 311 (63.2%)      | 53 (59.6%)                          | 258 (64.0%)                      | 0.503   |
| Diabetes mellitus                                    | 144 (29.3%)      | 22 (24.7%)                          | 122 (30.3%)                      | 0.361   |
| Dyslipidemia                                         | 86 (17.5%)       | 7 (7.9%)                            | 79 (19.6%)                       | 0.013   |
| Coronary artery disease                              | 13 (2.6%)        | 3 (3.4%)                            | 10 (2.5%)                        | 0.914   |
| Smoking                                              | 211 (42.9%)      | 39 (43.8%)                          | 172 (42.7%)                      | 0.938   |
| Prior stroke or TIA                                  | 48 (9.8%)        | 9 (10.1%)                           | 39 (9.7%)                        | 1.000   |
| <b>Laboratory findings, mean <math>\pm</math> SD</b> |                  |                                     |                                  |         |
| Fasting glucose, mg/dL                               | 117.0 $\pm$ 41.2 | 109.1 $\pm$ 32.5                    | 118.7 $\pm$ 42.7                 | 0.023   |
| LDL-C, mg/dL                                         | 123.5 $\pm$ 36.9 | 117.8 $\pm$ 36.9                    | 124.7 $\pm$ 36.8                 | 0.108   |
| HDL-C, mg/dL                                         | 45.6 $\pm$ 12.3  | 44.4 $\pm$ 9.8                      | 45.8 $\pm$ 12.8                  | 0.236   |
| Triglyceride, mg/dL                                  | 136.5 $\pm$ 76.0 | 128.1 $\pm$ 73.1                    | 138.3 $\pm$ 76.6                 | 0.252   |
| Total cholesterol, mg/dL                             | 185.2 $\pm$ 40.9 | 178.6 $\pm$ 40.3                    | 186.6 $\pm$ 41.0                 | 0.098   |
| CRP, mg/dL                                           | 0.7 $\pm$ 1.6    | 0.5 $\pm$ 1.4                       | 0.8 $\pm$ 1.7                    | 0.065   |
| Systolic blood pressure, mm Hg                       | 157.1 $\pm$ 26.2 | 154.9 $\pm$ 26.3                    | 157.5 $\pm$ 26.2                 | 0.388   |
| Diastolic blood pressure, mm Hg                      | 89.8 $\pm$ 16.0  | 89.1 $\pm$ 14.1                     | 89.9 $\pm$ 16.4                  | 0.652   |
| <b>Prior medication, n (%)</b>                       |                  |                                     |                                  |         |
| Antiplatelet                                         | 74 (15.0%)       | 23 (25.8%)                          | 51 (12.7%)                       | 0.003   |
| Antihypertensive treatment                           | 180 (36.6%)      | 41 (46.1%)                          | 139 (34.5%)                      | 0.054   |

|                                                      |             |            |             |        |
|------------------------------------------------------|-------------|------------|-------------|--------|
| <b>Neuroimaging analysis</b>                         |             |            |             |        |
| Branch atheromatous lesion                           | 173 (35.2%) | 30 (33.7%) | 143 (35.5%) | 0.845  |
| Parent artery stenosis (0-50%)                       | 170 (34.6%) | 28 (31.5%) | 142 (35.2%) | 0.579  |
| Location of SSSI                                     |             |            |             | 0.095  |
| Anterior circulation                                 | 262 (53.3%) | 55 (61.8%) | 207 (51.4%) |        |
| Posterior circulation                                | 230 (46.7%) | 34 (38.2%) | 196 (48.6%) |        |
| <b>Regimen of antiplatelet in acute phase, n (%)</b> |             |            |             | <0.001 |
| No antiplatelet                                      | 19 (3.9%)   | 6 (6.7%)   | 13 (3.2%)   |        |
| Single antiplatelet                                  | 190 (38.6%) | 59 (66.3%) | 131 (32.5%) |        |
| Dual antiplatelet                                    | 283 (57.5%) | 24 (27.0%) | 259 (64.3%) |        |
| <b>Initiation time of statin from symptom onset</b>  |             |            |             | 0.608  |
| ≤ 24 hours                                           | 292 (59.3%) | 56 (62.9%) | 236 (58.6%) |        |
| 24-48 hours                                          | 143 (29.1%) | 22 (24.7%) | 121 (30.0%) |        |
| 48-72 hours                                          | 57 (11.6%)  | 11 (12.4%) | 46 (11.4%)  |        |
| END, n (%)                                           | 102 (20.7%) | 29 (32.6%) | 73 (18.1%)  | 0.004  |

Data are presented as n (%), or median [interquartile range]. SD indicates standard deviation; IQR, interquartile range; END, early neurologic deterioration; NIHSS, National Institutes of Health Stroke Scale; TIA, Transient ischemic attack; LDL-C, low-density lipoprotein cholesterol; HDL-C, high-density lipoprotein cholesterol; CRP, c-reactive protein; SSSI, Single small subcortical infarction; END, early neurological deterioration.

**Supplementary Table S3.** Early neurological deterioration between high-intensity atorvastatin and moderate to low intensity atorvastatin

|     | High-intensity<br>(n=384) | Moderate to low<br>intensity (n=48) | P-value |
|-----|---------------------------|-------------------------------------|---------|
| END | 70 (18.2)                 | 21 (43.8)                           | <0.001  |

Data are presented as n (%). END, early neurological deterioration

**Supplementary Table S4.** Early neurological deterioration between high-intensity atorvastatin and moderate to low intensity rosuvastatin.

|     | High-intensity (n=19) | Moderate to low intensity (n=42) | P-value |
|-----|-----------------------|----------------------------------|---------|
| END | 3 (15.8)              | 16 (38.1)                        | 0.026   |

Data are presented as n (%). END, early neurological deterioration\

**Supplementary Table S5.** Baseline characteristics before propensity score matching

|                                                      | Total (n=492)    | Moderate-intensity statin (n=89) | High-intensity statin (n=403) | SMD   |
|------------------------------------------------------|------------------|----------------------------------|-------------------------------|-------|
| Age, y, mean $\pm$ SD                                | 67.2 $\pm$ 12.0  | 69.4 $\pm$ 10.8                  | 66.7 $\pm$ 12.2               | 0.067 |
| Male, n (%)                                          | 297 (60.4%)      | 49 (55.1%)                       | 248 (61.5%)                   | 0.034 |
| Initial NIHSS score, median (IQR)                    | 3.0 [1.0;4.0]    | 3.0 [1.0; 4.0]                   | 3.0 [1.0; 4.0]                | 0.016 |
| Onset to arrival time, h, median (IQR)               | 14.7 [5.0;28.5]  | 14.7 [3.7;27.2]                  | 14.6 [5.4;28.9]               | 0.022 |
| <b>Vascular risk factors, n (%)</b>                  |                  |                                  |                               |       |
| Hypertension                                         | 311 (63.2%)      | 53 (59.6%)                       | 258 (64.0%)                   | 0.092 |
| Diabetes mellitus                                    | 144 (29.3%)      | 22 (24.7%)                       | 122 (30.3%)                   | 0.124 |
| Dyslipidemia                                         | 86 (17.5%)       | 7 (7.9%)                         | 79 (19.6%)                    | 0.345 |
| Coronary artery disease                              | 13 (2.6%)        | 3 (3.4%)                         | 10 (2.5%)                     | 0.053 |
| Smoking                                              | 211 (42.9%)      | 39 (43.8%)                       | 172 (42.7%)                   | 0.023 |
| Prior stroke or TIA                                  | 48 (9.8%)        | 9 (10.1%)                        | 39 (9.7%)                     | 0.015 |
| <b>Laboratory findings, mean <math>\pm</math> SD</b> |                  |                                  |                               |       |
| Fasting glucose, mg/dL                               | 117.0 $\pm$ 41.2 | 109.1 $\pm$ 32.5                 | 118.7 $\pm$ 42.7              | 0.089 |
| LDL-C, mg/dL                                         | 123.5 $\pm$ 36.9 | 117.8 $\pm$ 36.9                 | 124.7 $\pm$ 36.8              | 0.039 |
| HDL-C, mg/dL                                         | 45.6 $\pm$ 12.3  | 44.4 $\pm$ 9.8                   | 45.8 $\pm$ 12.8               | 0.128 |
| Triglyceride, mg/dL                                  | 136.5 $\pm$ 76.0 | 128.1 $\pm$ 73.1                 | 138.3 $\pm$ 76.6              | 0.005 |
| Total cholesterol, mg/dL                             | 185.2 $\pm$ 40.9 | 178.6 $\pm$ 40.3                 | 186.6 $\pm$ 41.0              | 0.017 |
| CRP, mg/dL                                           | 0.7 $\pm$ 1.6    | 0.5 $\pm$ 1.4                    | 0.8 $\pm$ 1.7                 | 0.115 |

|                                                      |              |              |              |       |
|------------------------------------------------------|--------------|--------------|--------------|-------|
| Systolic blood pressure, mm Hg                       | 157.1 ± 26.2 | 154.9 ± 26.3 | 157.5 ± 26.2 | 0.101 |
| Diastolic blood pressure, mm Hg                      | 89.8 ± 16.0  | 89.1 ± 14.1  | 89.9 ± 16.4  | 0.055 |
| <b>Prior medication, n (%)</b>                       |              |              |              |       |
| Antiplatelet                                         | 74 (15.0%)   | 23 (25.8%)   | 51 (12.7%)   | 0.338 |
| Antihypertensive treatment                           | 180 (36.6%)  | 41 (46.1%)   | 139 (34.5%)  | 0.237 |
| <b>Neuroimaging analysis</b>                         |              |              |              |       |
| Branch atheromatous lesion                           | 173 (35.2%)  | 30 (33.7%)   | 143 (35.5%)  | 0.037 |
| Parent artery stenosis (0-50%)                       | 170 (34.6%)  | 28 (31.5%)   | 142 (35.2%)  | 0.080 |
| Location of SSSI                                     |              |              |              | 0.211 |
| Anterior circulation                                 | 262 (53.3%)  | 55 (61.8%)   | 207 (51.4%)  |       |
| Posterior circulation                                | 230 (46.7%)  | 34 (38.2%)   | 196 (48.6%)  |       |
| <b>Regimen of antiplatelet in acute phase, n (%)</b> |              |              |              | 0.744 |
| No antiplatelet                                      | 19 (3.9%)    | 6 (6.7%)     | 13 (3.2%)    |       |
| Single antiplatelet                                  | 190 (38.6%)  | 59 (66.3%)   | 131 (32.5%)  |       |
| Dual antiplatelet                                    | 283 (57.5%)  | 24 (27.0%)   | 259 (64.3%)  |       |
| <b>Initiation time of statin from symptom onset</b>  |              |              |              | 0.049 |
| ≤ 24 hours                                           | 292 (59.3%)  | 56 (62.9%)   | 236 (58.6%)  |       |
| 24-48 hours                                          | 143 (29.1%)  | 22 (24.7%)   | 121 (30.0%)  |       |
| 48-72 hours                                          | 57 (11.6%)   | 11 (12.4%)   | 46 (11.4%)   |       |
| END, n (%)                                           | 102 (20.7%)  | 29 (32.6%)   | 73 (18.1%)   | 0.336 |

Data are presented as n (%), or median [interquartile range]. SMD, standard mean difference; SD, standard deviation; IQR, interquartile range; END, early neurologic deterioration; NIHSS, National Institutes of Health Stroke Scale; TIA, Transient ischemic attack; LDL-C, low-density lipoprotein cholesterol; HDL-C, high-density lipoprotein cholesterol; CRP, c-reactive protein; SSSI, Single small subcortical infarction; END, early neurological deterioration.

**Supplementary Table S6.** Baseline characteristics after propensity score matching.

|                                                      | Total (n=268)    | Moderate-intensity statin<br>(n=179) | High-intensity statin<br>(n=89) | SMD    |
|------------------------------------------------------|------------------|--------------------------------------|---------------------------------|--------|
| Age, y, mean $\pm$ SD                                | 68.9 $\pm$ 10.9  | 68.6 $\pm$ 10.9                      | 69.4 $\pm$ 10.8                 | 0.067  |
| Male, n (%)                                          | 144 (53.9)       | 95 (53.4)                            | 49 (55.1%)                      | 0.034  |
| Initial NIHSS score, median (IQR)                    | 3 [1-4]          | 3 [1-4]                              | 2 [1-4]                         | 0.016  |
| Onset to arrival time, h, median (IQR)               | 18.5 [13.9-26.7] | 14.7 [3.4-27.3]                      | 13.4 [4.7-26.4]                 | 0.022  |
| <b>Vascular risk factors, n (%)</b>                  |                  |                                      |                                 |        |
| Hypertension                                         | 166 (62.2)       | 113 (63.5)                           | 53 (59.6)                       | 0.081  |
| Diabetes mellitus                                    | 74 (27.7)        | 52 (29.2)                            | 22 (24.7)                       | 0.101  |
| Dyslipidemia                                         | 32 (12.0)        | 25 (14.0)                            | 7 (7.9)                         | 0.198  |
| Coronary artery disease                              | 5 (1.9)          | 2 (1.1)                              | 3 (3.4)                         | 0.151  |
| Smoking                                              | 109 (40.8)       | 70 (39.3)                            | 39 (43.8)                       | 0.091  |
| Prior stroke or TIA                                  | 27 (10.1)        | 18 (10.1)                            | 9 (10.1)                        | <0.001 |
| <b>Laboratory findings, mean <math>\pm</math> SD</b> |                  |                                      |                                 |        |
| Fasting glucose, mg/dL                               | 118.1 $\pm$ 84.9 | 117.4 $\pm$ 75.1                     | 119.8 $\pm$ 102.9               | 0.027  |
| LDL-C, mg/dL                                         | 120.1 $\pm$ 34.6 | 121.3 $\pm$ 33.5                     | 117.8 $\pm$ 36.9                | 0.101  |
| HDL-C, mg/dL                                         | 45.5 $\pm$ 12.7  | 46.0 $\pm$ 13.9                      | 44.4 $\pm$ 9.8                  | 0.138  |
| Triglyceride, mg/dL                                  | 133.6 $\pm$ 75.0 | 136.3 $\pm$ 75.0                     | 128.1 $\pm$ 73.1                | 0.111  |
| Total cholesterol, mg/dL                             | 182.4 $\pm$ 38.0 | 184.3 $\pm$ 36.7                     | 178.6 $\pm$ 40.3                | 0.146  |
| CRP, mg/dL                                           | 0.6 $\pm$ 1.7    | 0.7 $\pm$ 1.8                        | 0.5 $\pm$ 1.4                   | 0.158  |
| Systolic blood pressure, mm Hg                       | 154.9 $\pm$ 26.1 | 154.0 $\pm$ 26.2                     | 154.9 $\pm$ 26.3                | 0.001  |
| Diastolic blood pressure, mm Hg                      | 89.0 $\pm$ 15.1  | 88.9 $\pm$ 15.6                      | 89.1 $\pm$ 14.1                 | 0.012  |
| <b>Prior medication, n (%)</b>                       |                  |                                      |                                 |        |
| Antiplatelet                                         | 51 (19.1)        | 28 (15.7)                            | 23 (25.8)                       | 0.250  |
| Antihypertensive treatment                           | 102 (38.2)       | 61 (34.3)                            | 41 (46.1)                       | 0.241  |
| <b>Neuroimaging analysis</b>                         |                  |                                      |                                 |        |
| Branch atheromatous lesion                           | 78 (29.2)        | 48 (27.0)                            | 30 (33.7)                       | 0.146  |
| Parent artery stenosis (0-50%)                       | 93 (34.8)        | 65 (36.5)                            | 28 (31.5)                       | 0.106  |

|                                                      |            |            |           |       |
|------------------------------------------------------|------------|------------|-----------|-------|
| Location of SSSI                                     |            |            |           | 0.092 |
| Anterior circulation                                 | 160 (59.9) | 104 (58.4) | 54 (62.9) |       |
| Posterior circulation                                | 107 (40.1) | 74 (41.6)  | 33 (37.1) |       |
| <b>Regimen of antiplatelet in acute phase, n (%)</b> |            |            |           | 0.668 |
| No antiplatelet                                      | 14 (5.2)   | 8 (4.5)    | 6 (6.7)   |       |
| Single antiplatelet                                  | 118 (44.2) | 59 (33.1)  | 59 (66.3) |       |
| Dual antiplatelet                                    | 135 (50.6) | 111 (62.4) | 24 (27.0) |       |
| <b>Initiation time of statin from symptom onset</b>  |            |            |           | 0.024 |
| ≤ 24 hours                                           | 164 (61.4) | 108 (60.7) | 56 (62.9) |       |
| 24-48 hours                                          | 71 (26.6)  | 49 (20.5)  | 22 (14.7) |       |
| 48-72 hours                                          | 31 (12.0)  | 21 (11.8)  | 11 (12.4) |       |
| END, n (%)                                           | 58 (21.7)  | 29 (16.3)  | 29 (32.6) | 0.384 |

Data are presented as n (%), or median [interquartile range]. SMD, standard mean difference; SD indicates standard deviation; IQR, interquartile range; END, early neurologic deterioration; NIHSS, National Institutes of Health Stroke Scale; TIA, Transient ischemic attack; LDL-C, low-density lipoprotein cholesterol; HDL-C, high-density lipoprotein cholesterol; CRP, c-reactive protein; SSSI, Single small subcortical infarction; END, early neurological deterioration.

**Supplementary Figure S1.** Subgroup analysis of END according to statin intensity

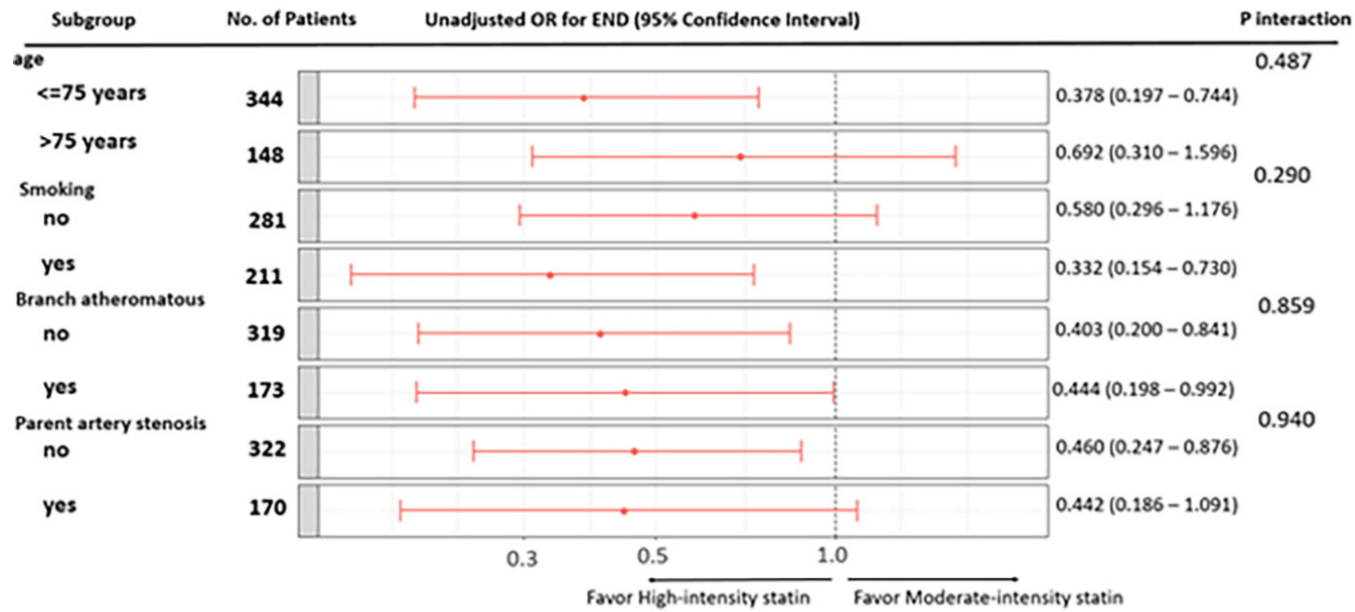



Supplementary Figure S2. Functional outcome at 3 months according to END.

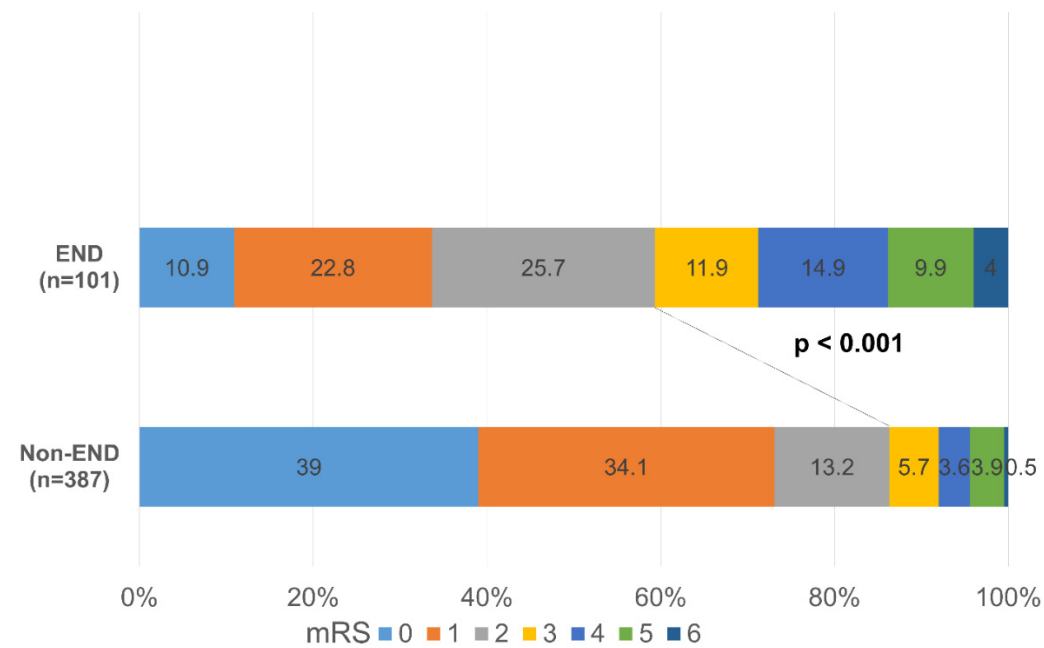

END, early neurologic deterioration; mRS, modified Rankin Scale.
